# Supplementary material for: Incorporating evidence review into quality improvement: meeting the needs of innovators
Source: PubMed Central journal article supplement — BMJ Qual Saf. 2013 Jul 5;22(11):931–9. doi: 10.1136/bmjqs-2012-001722 (PMC3812883; doi:10.1136/bmjqs-2012-001722), 2013-07-05
Supplement: bmjqs-2012-001722-s1.pdf [file bmjqs-2012-001722-s1.pdf]

**APPENDIX A. Responsive Innovation Evidence Review Request Form**

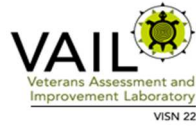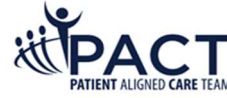

**Responsive Innovation Evidence Review REQUEST FORM**

**Problem, Area of Concern, or Outcome Measure to Improve:**

**Priority:** High..... Medium..... Low.....

**Date of Request:** \_\_\_\_\_ **Desired Output Date:** \_\_\_\_\_

**Specific Questions:**

**Innovations Being Considered:**

**Contact Information:**

**Name:** \_\_\_\_\_ **Group:** QC... \_\_\_\_\_ WG... \_\_\_\_\_

**Phone:** \_\_\_\_\_ **Fax:** \_\_\_\_\_ **Email:** \_\_\_\_\_
